# Supplementary material
Source: PubMed Central journal article supplement (PMC5056227)
Supplement: BPH-173-3080-s002.pdf [file BPH-173-3080-s002.pdf]

**Table 1S**

| <b>Subject</b> | <b>Age</b> | <b>Gender</b> | <b>Cause of Death</b>    |
|----------------|------------|---------------|--------------------------|
| 1              | 28         | Female        | Cerebrovascular Attack   |
| 2              | 45         | Male          | Overdose (sleeping meds) |
| 3              | 15         | Male          | Head trauma              |
| 4              | 21         | Male          | Anoxic brain injury      |
| 5              | 52         | Male          | Anoxia                   |
| 6              | 59         | Male          | Cerebrovascular Attack   |
| 7              | 30         | Male          | Head trauma              |
| 8              | 29         | Male          | Head trauma              |
| 9              | 62         | Female        | Cerebrovascular Attack   |
| 10             | 68         | Female        | Cerebrovascular Attack   |
| 11             | 66         | Male          | Cerebrovascular Attack   |
