# Supplementary material
Source: PubMed Central journal article supplement (PMC5056227)
Supplement: BPH-173-3080-s005.pdf [file BPH-173-3080-s005.pdf]

**Figure 2S**

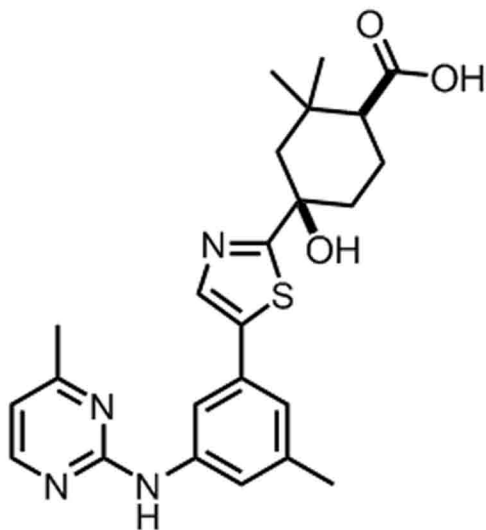

IUPAC name: (1*S*,4*R*)-4-hydroxy-2,2-dimethyl-4-(5-(3-methyl-5-((4-methylpyrimidin-2-yl)amino)phenyl)thiazol-2-yl)cyclohexane-1-carboxylic acid
