# Supplementary material
Source: PubMed Central journal article supplement (PMC5056227)

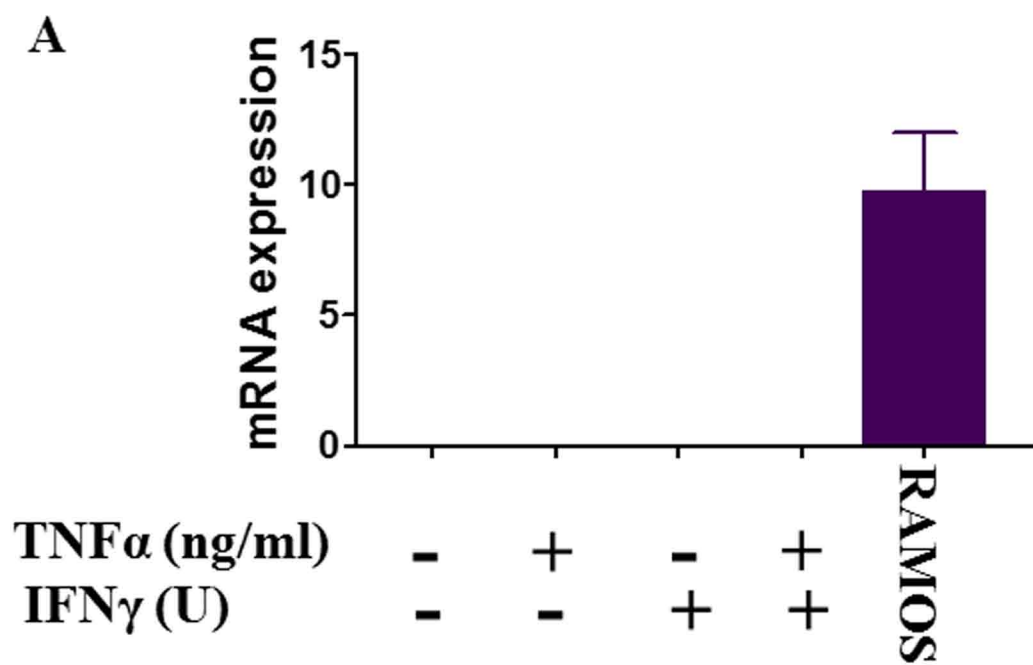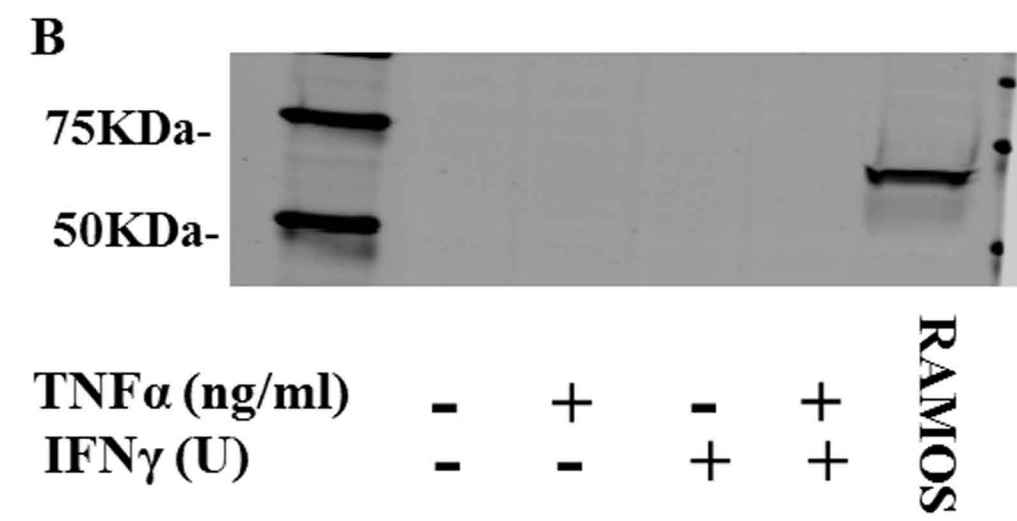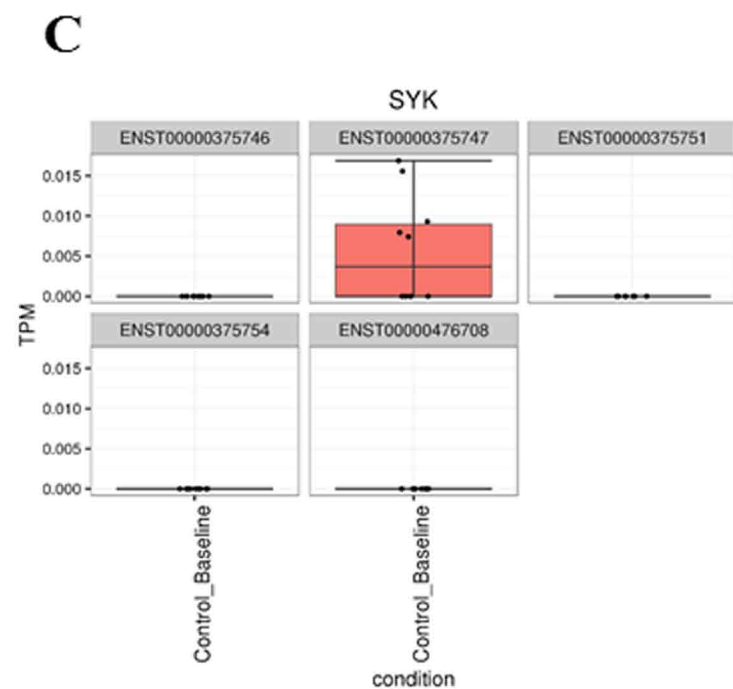

Supplement: BPH-173-3080-s004.pdf [file BPH-173-3080-s004.pdf]

A

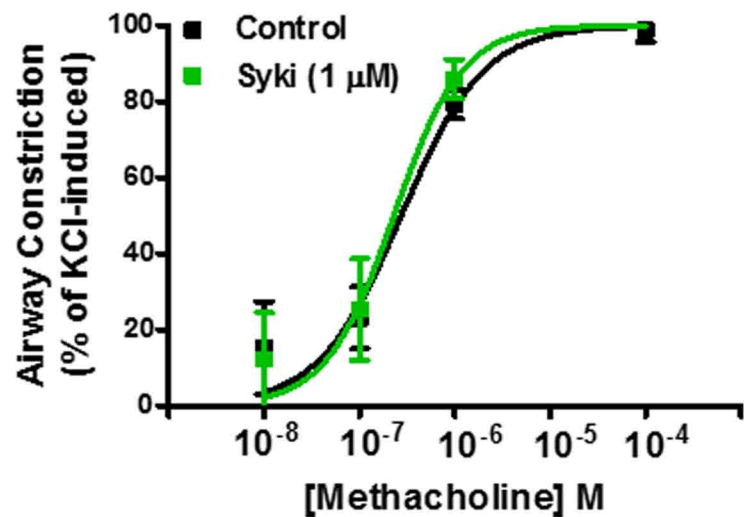

B

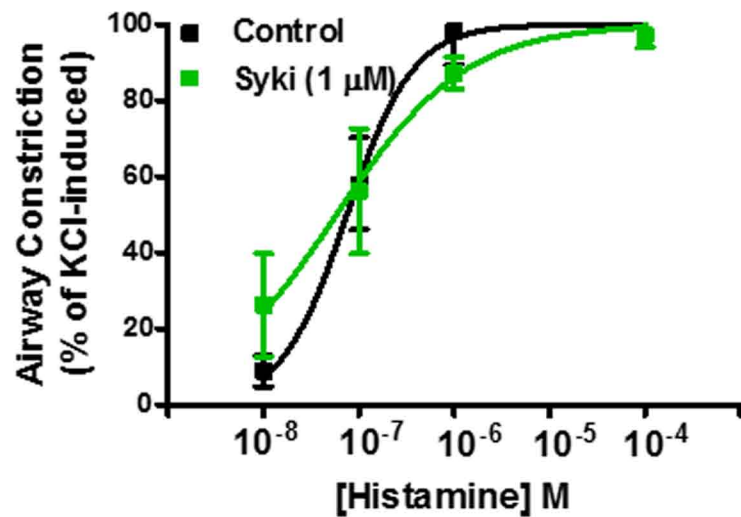

C

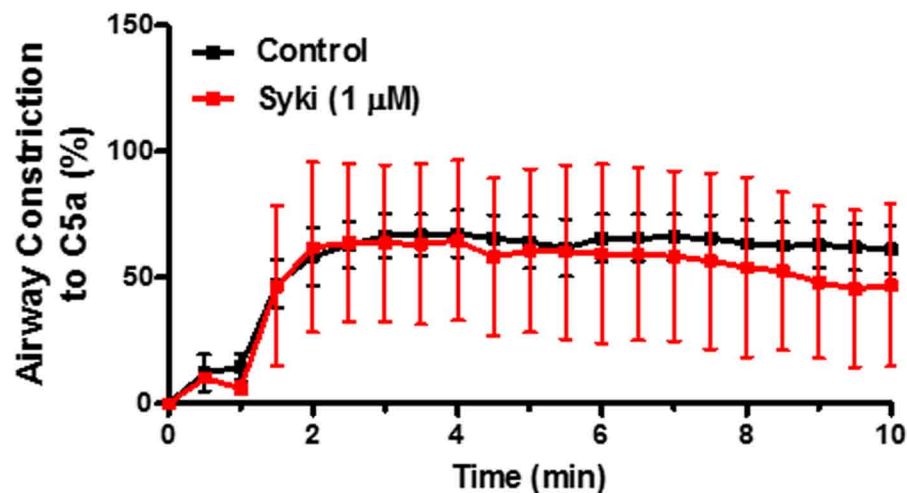

Supplement: BPH-173-3080-s006.pdf [file BPH-173-3080-s006.pdf]
